# Supplementary material for: Robust non-covalent and covalent anchored N,N,N′,N’-tetramethyl-p-phenylenediamine derivative on electrode surface via spontaneous physical immobilization and in situ generated aryldiazonium ion electro-grafting: implication for on-surface chemistry and electro-catalytic determinations
Source: Royal Society of Chemistry journal article supplement (doi:10.1039/c9an01628g), 2019-11-12
Supplement: c9an01628g1.pdf [file c9an01628g1.pdf]

## Supporting Information

**Robust non-covalent and covalent anchored *N,N,N',N'*-tetramethyl-*p*-phenylenediamine derivative on electrode surface via spontaneous physical immobilization and in situ generated aryldiazonium ion electro-grafting: implication for on-surface chemistry and electro-catalytic determinations**

**Mahsa Taleghan Ghafari<sup>a</sup>, Fahimeh Varmaghani<sup>\*a,b</sup>, Babak Karimi<sup>a,b</sup>, and Vahid Khakyzadeh<sup>c</sup>**

*<sup>a</sup>Department of Chemistry, Institute for Advanced Studies in Basic Sciences (IASBS), Zanjan, 45137-66731, Iran*

*<sup>b</sup>Center for Research in Basic Sciences and Contemporary Technologies, Institute for Advanced Studies in Basic Sciences (IASBS), Zanjan, 45137-66731, Iran*

*<sup>c</sup>Department of Chemistry, K. N. Toosi University of Technology, P.O. Box 16315-1618, 15418 Tehran, Iran.*

*Tel.: +98 24 33153125; Fax: +98 24 33153232.*

*E-mail: f.varmaghani@iasbs.ac.ir,*

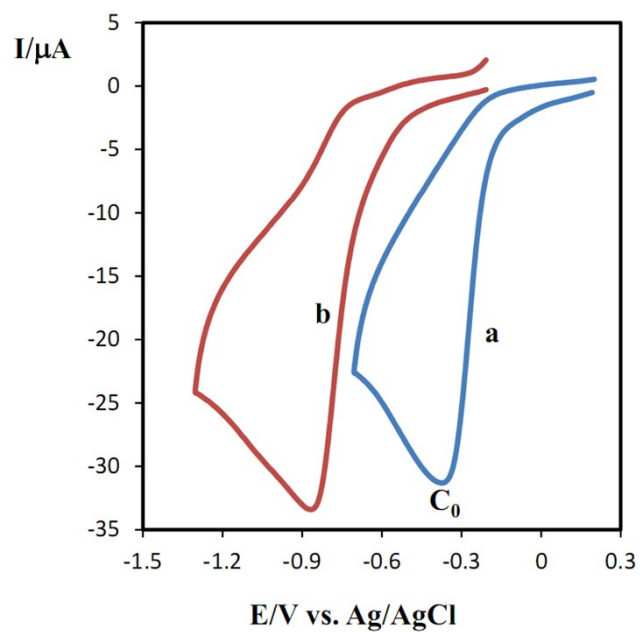

**Fig. 1S:** Cyclic voltammograms of 0.5 mM MNPD at a glassy carbon electrode in acetonitrile/aqueous solutions (4 ml ACN/6 ml buffer solution, 0.2 M), with pH values of (a) 2 and (b) 7. Scan rate: 100 mV/s.

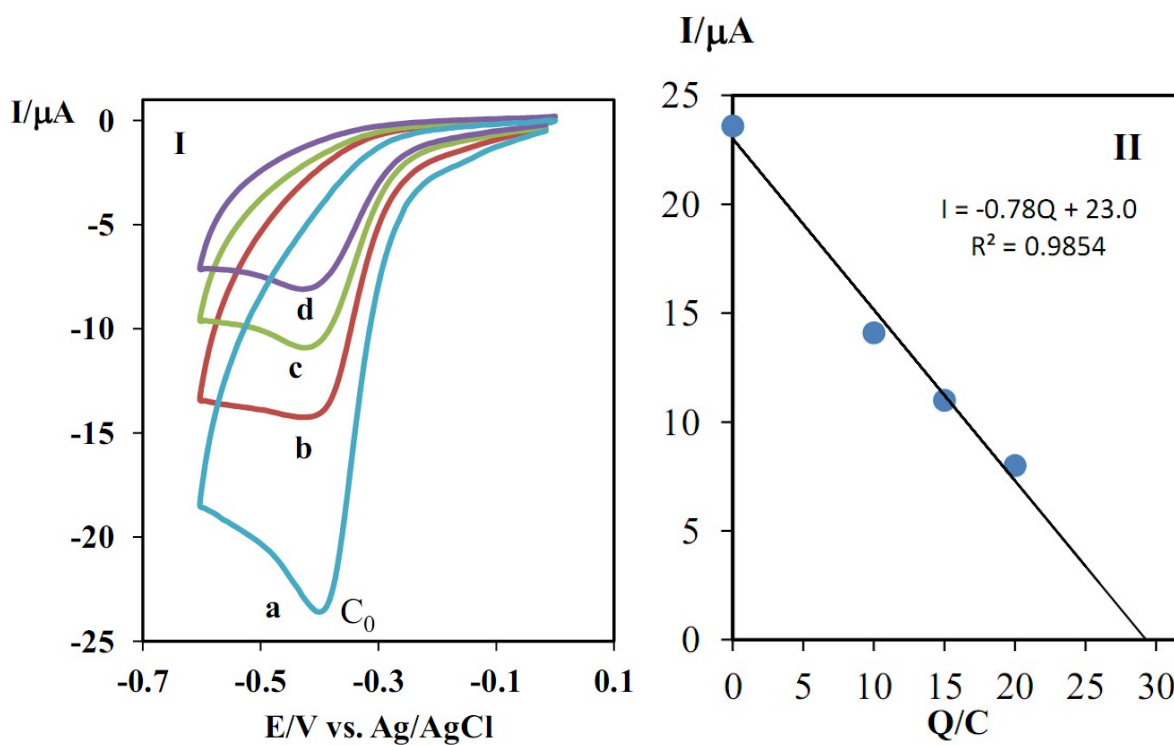

**Fig. 2S.** Part I: Cyclic voltammograms of 0.04 mmol MNPd, in acetonitrile/aqueous phosphate buffer solution with  $p\text{H}=2.0$  (45 ml ACN/45 ml buffer solution) at glassy carbon electrode during controlled-potential coulometry at  $-0.6$  V versus Ag/AgCl. After consumption of: (a) 0, (b) 10, (c) 15 and (d) 20 C. Part II: variation of peak current ( $I_{pC0}$ ) versus charge consumed. Scan rate  $100 \text{ mVs}^{-1}$ .

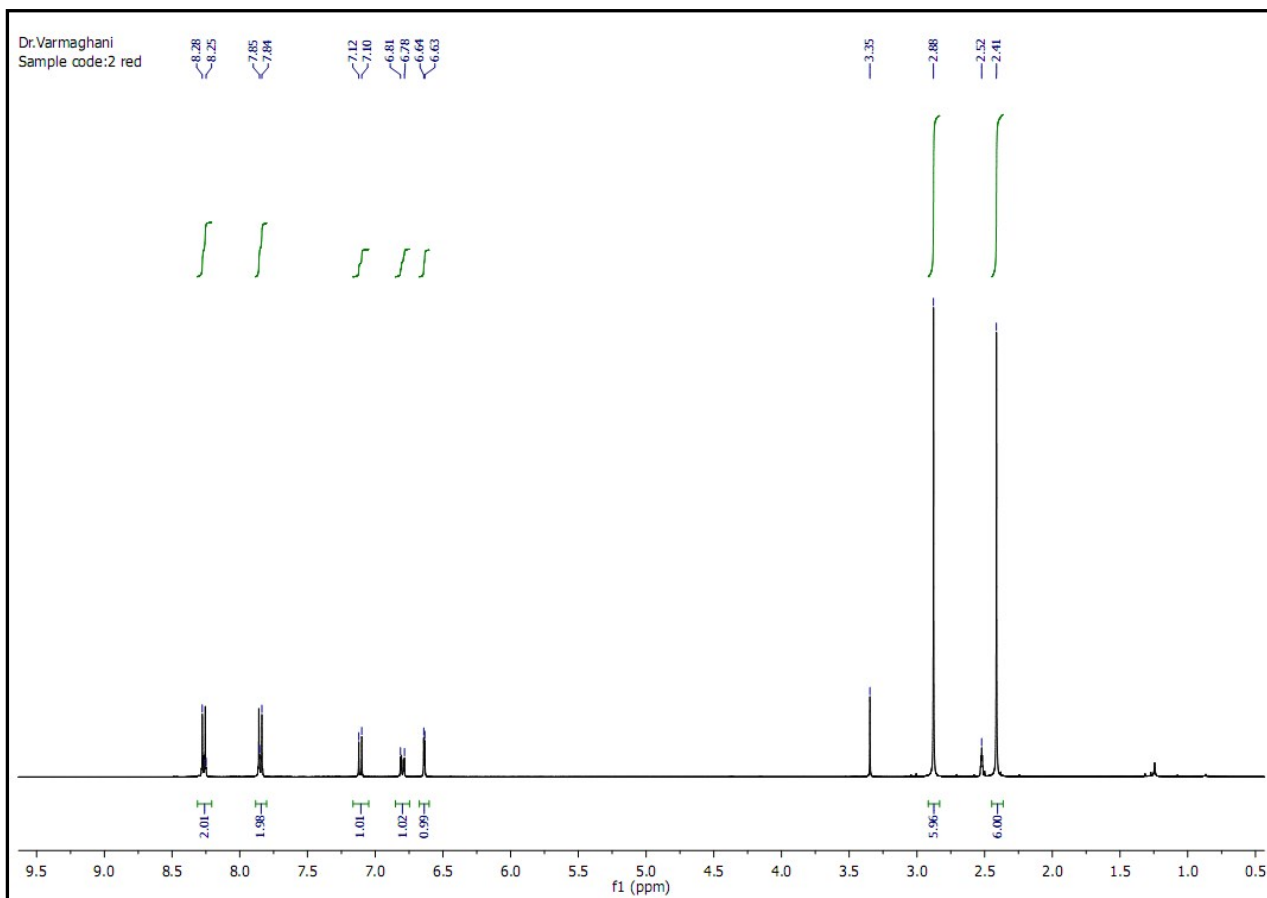

**Figure 3S:**  $^1\text{H}$ NMR of MNPD.

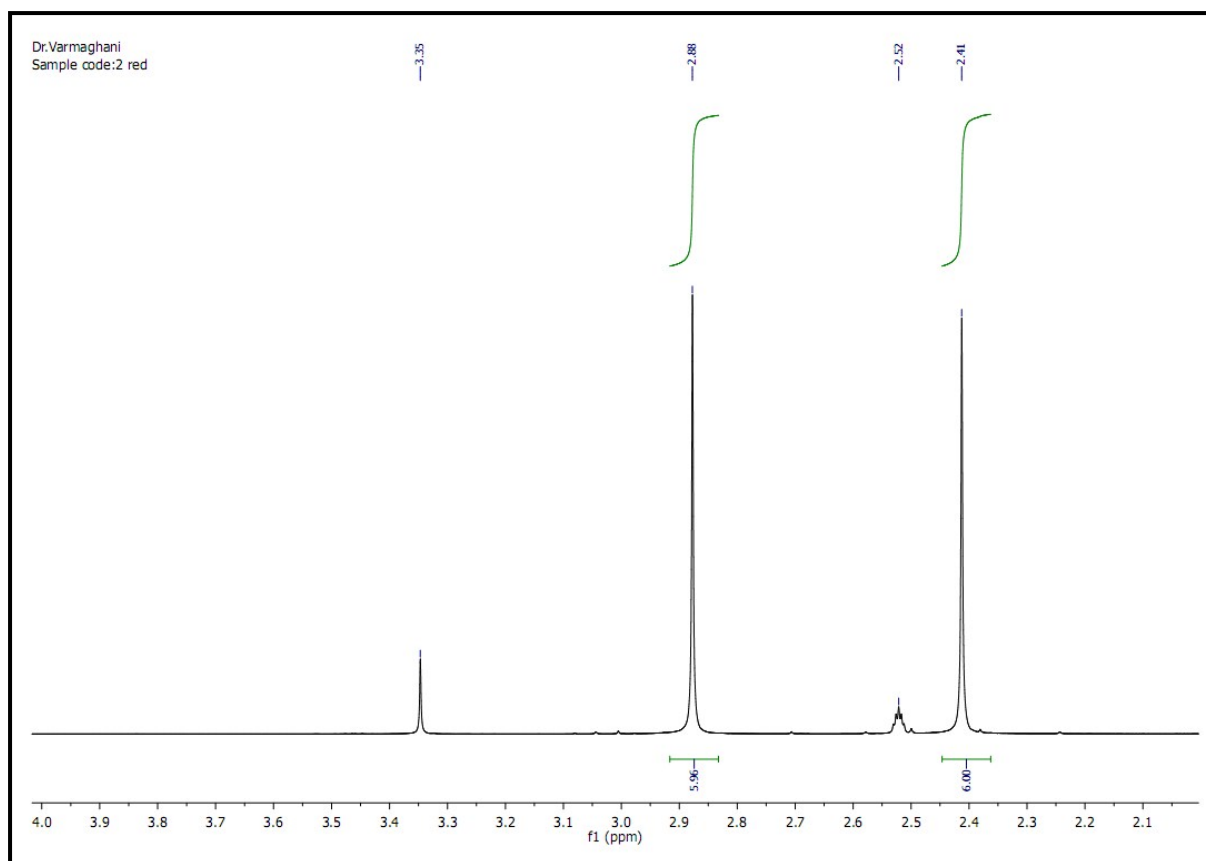

**Figure 4S:** Expanded  $^1\text{H}$ NMR of MNPD in the range of 2-4 ppm

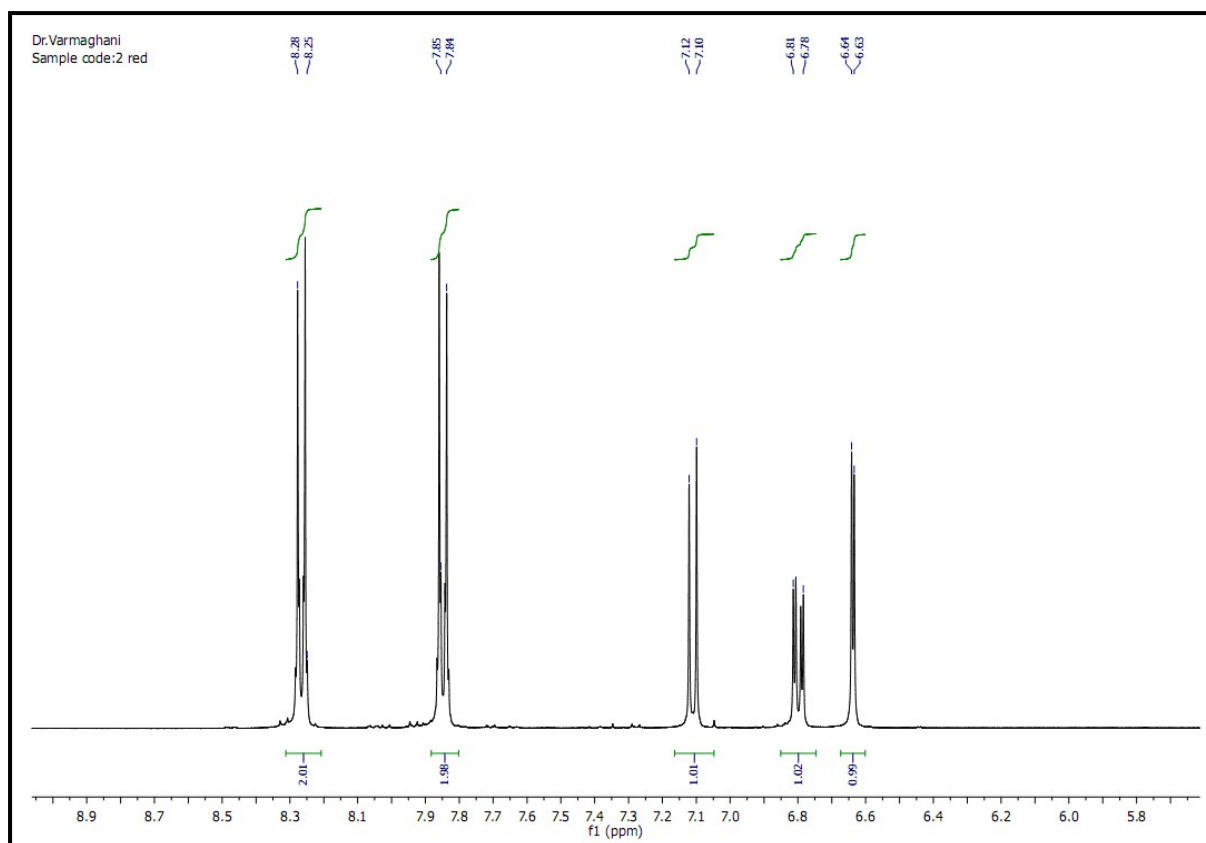

**Figure 5S:** Expanded  $^1\text{H}$ NMR of MNPD in the range of 5-9 ppm

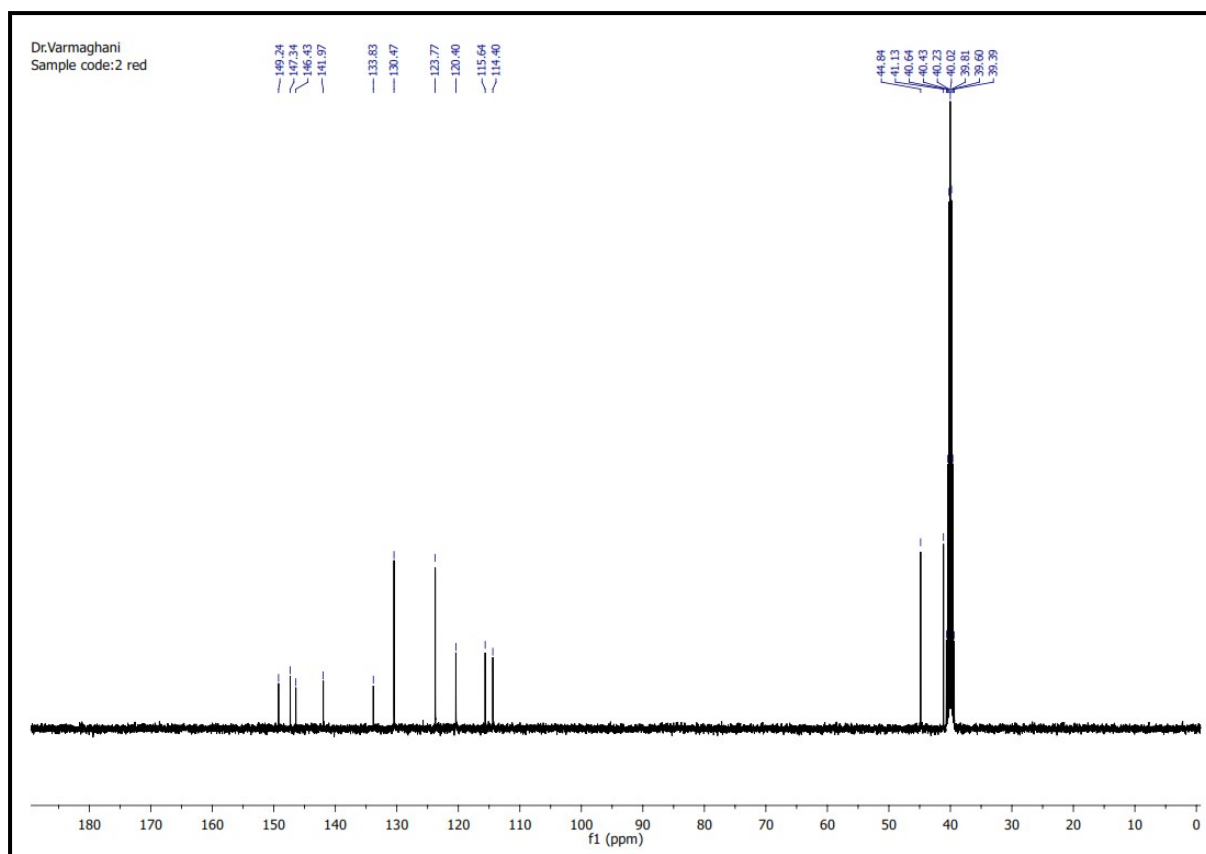

**Figure 6S:**  $^{13}\text{C}$ NMR of MNPD

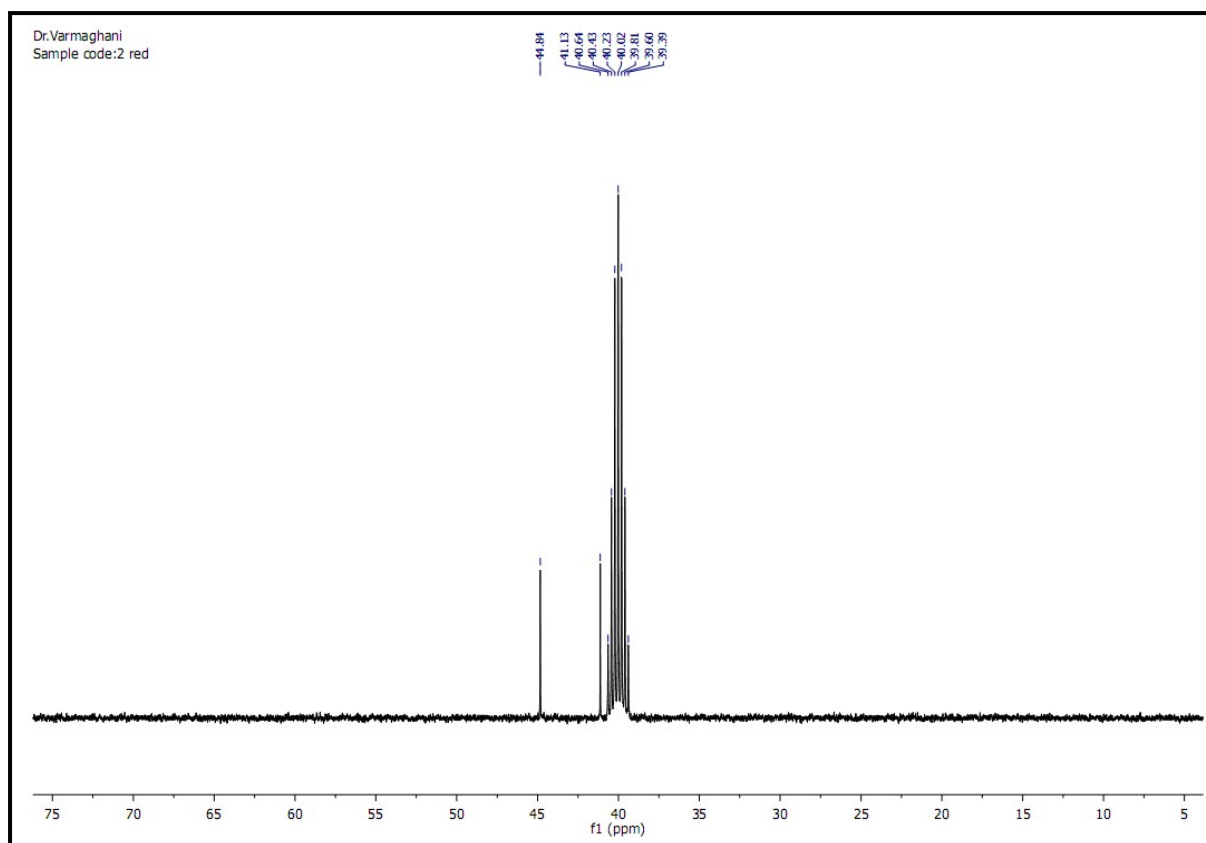

**Figure 7S:** Expanded  $^{13}\text{C}$ NMR of MNPD in the range of 0 to 75 ppm



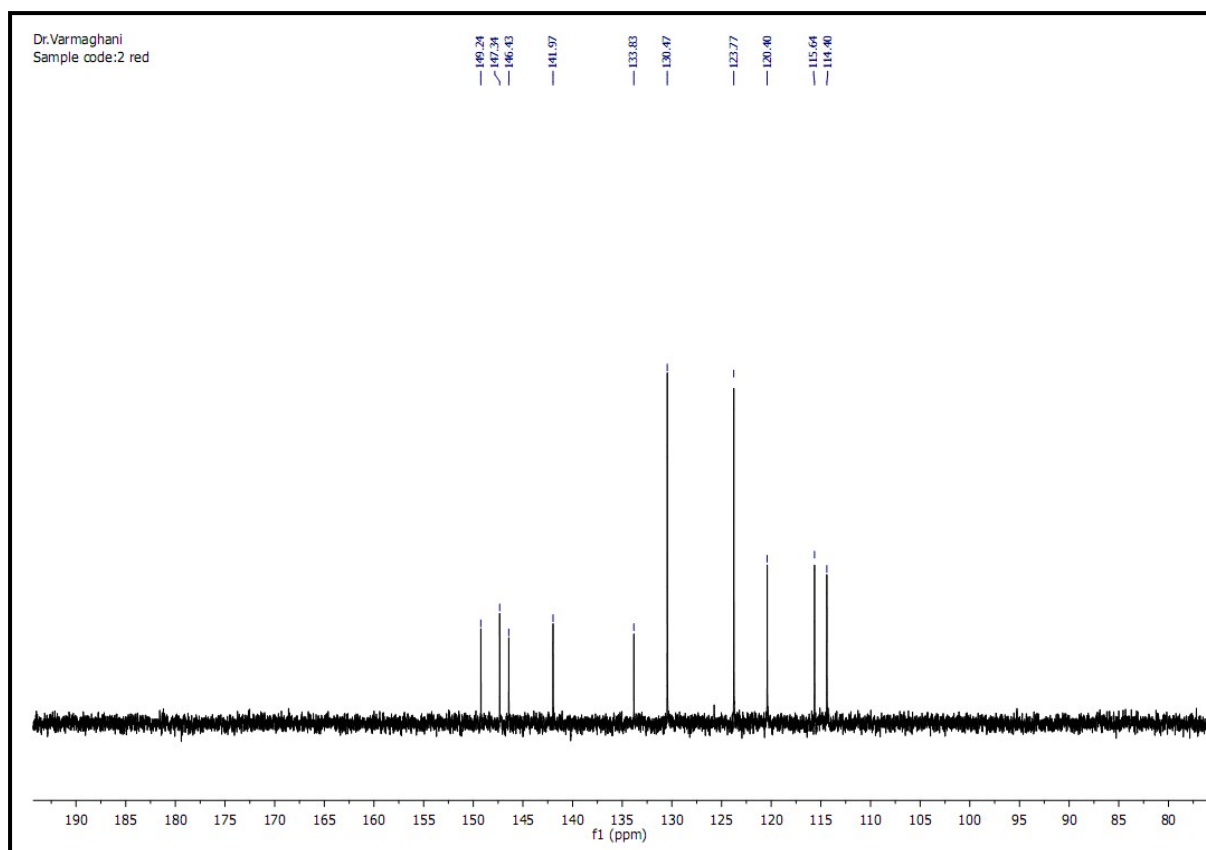

**Figure 8S:** Expanded  $^{13}\text{C}$ NMR of MNPD in the range of 75 to 200 ppm

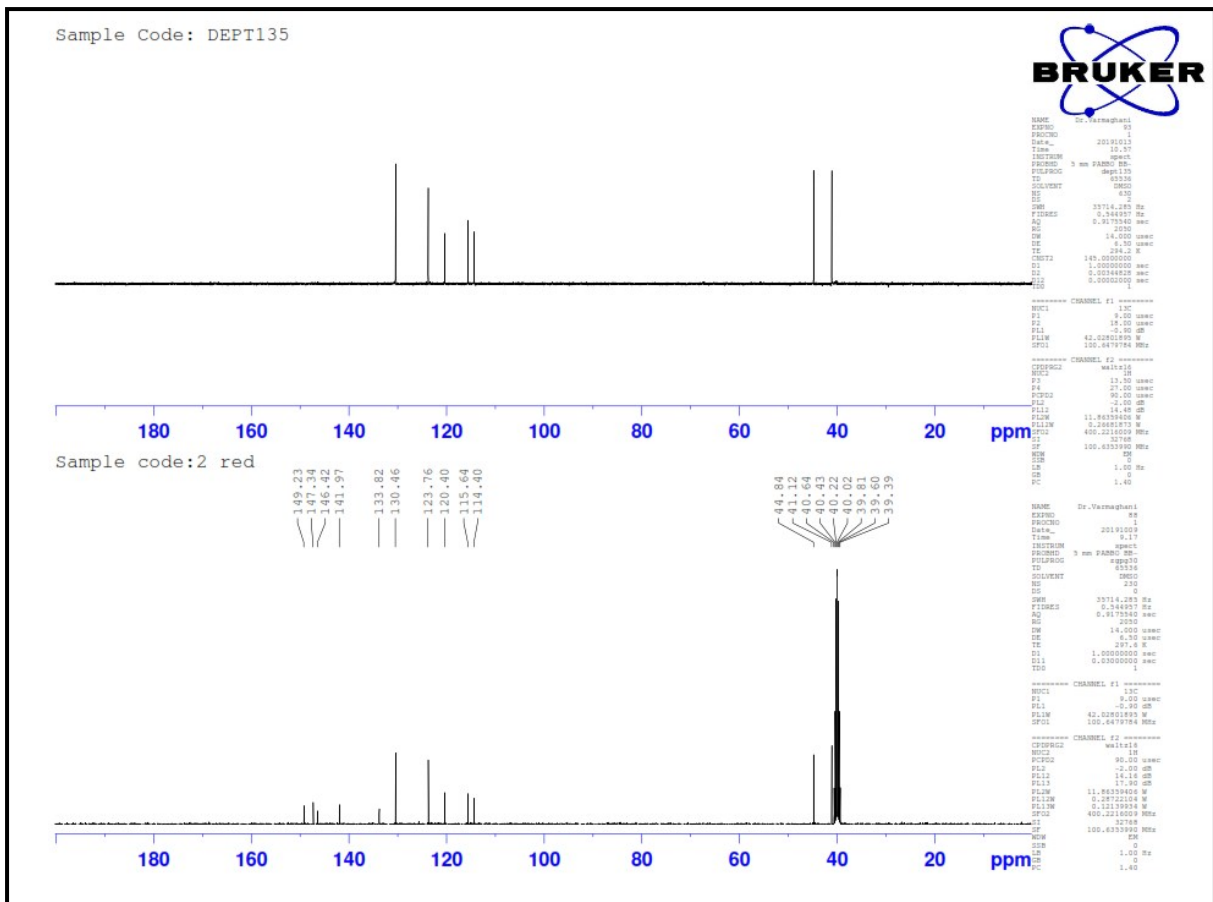

Figure 9S: Comparison of  $^{13}\text{C}$ NMR and DEPT 135 $^{\circ}$  of MNPD

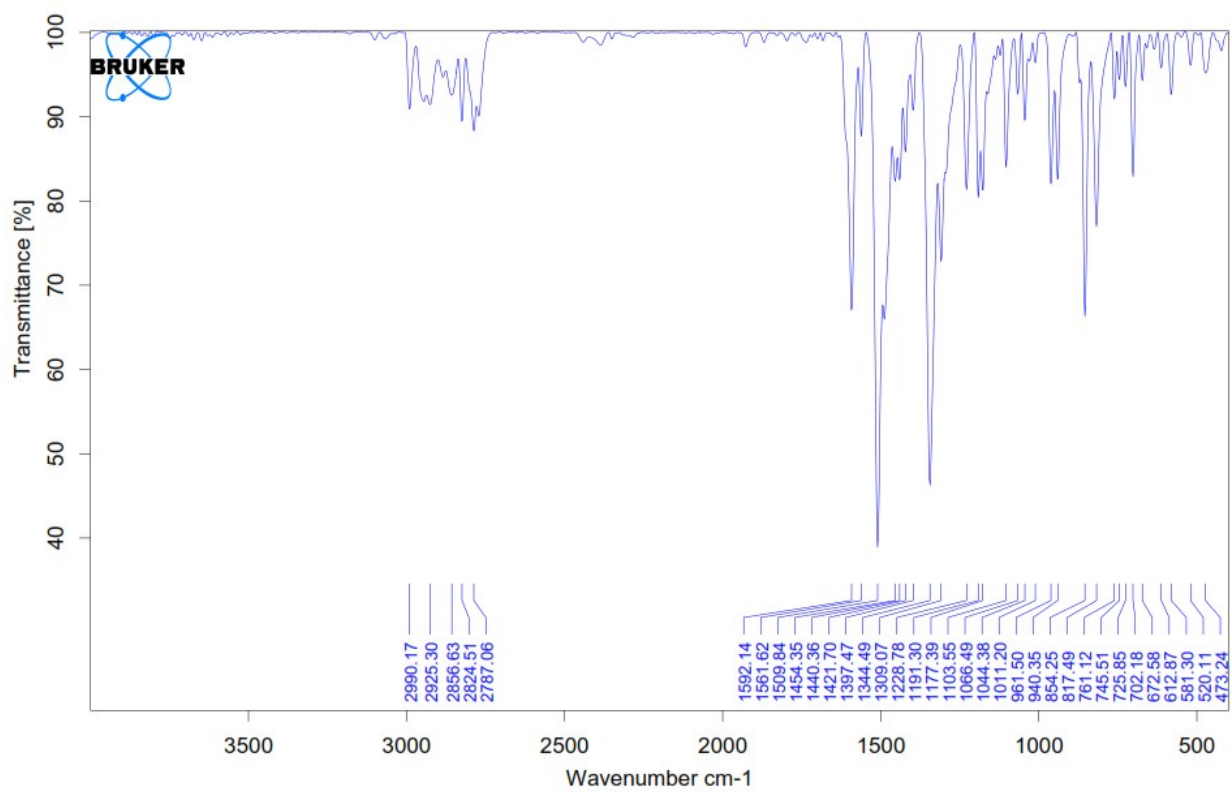

**Figure 10S:** FTIR of MNPD
